# Supplementary material
Source: Research Square preprint supplement (doi:10.21203/rs.3.rs-8899039/v1)
Supplement: Supplementary file 1 [file 1db411650efffb0f2049e51a.xlsx]

## Sheet: Supplementary table 1 
Supplementary table 1. Multivariate linear mixed-effects model analysis of factors associated with LF and MRD-1.
	LF			MRD-1
	Estimate	95% CI	P	Estimate	95% CI	P
Intercept	13.21	8.32, 18.11	<0.001	-3.37	-7.93, 1.19	0.15
Fibrotic area index(%)	0.06	0.02, 0.10	0.002	0.01	0.00, 0.03	0.51
Age	-0.06	-0.12, -0.01	0.03	-0.02	-0.03, 0.06	0.49
Sex(1=male)	-1.41	-2.78, -0.04	0.04	0.54	-0.51, 1.60	0.31
LF				0.37	0.16, 0.58	<0.001
