# Supplementary material
Source: Research Square preprint supplement (doi:10.21203/rs.3.rs-8899039/v1)
Supplement: Supplementary file 2 [file 38e8ac95c10864a218691c10.xlsx]

## Sheet: Table1
Table 1. Univariate linear mixed-effects model analysis of factors associated with clinical and histological parameters.
Dependent Variable	Independent Variable	Estimate	95% CI	P
MRD-1 (mm)	Fibrotic area index(%)	0.03	0.01, 0.05	0.02
MRD-1 (mm)	Fat area index(%)	-0.01	-0.02, 0.00	0.16
MRD-1 (mm)	LF	0.38	0.20, 0.06	<0.001
MRD-1 (mm)	Age	-0.02	-0.06, 0.03	0.44
MRD-1 (mm)	Sex	0.29	-0.79, 1.36	0.6
LF(mm)	Fibrotic area index(%)	0.06	0.02, 0.09	0.01
LF(mm)	Fat area index(%)	-0.01	-0.02, 0.01	0.35
LF(mm)	Age	-0.07	-0.14, 0.00	0.04
LF(mm)	Sex	-0.63	-2.41, 1.14	0.48
Fibrotic area index(%)	Fat area index(%)	-0.2	-0.34, -0.05	0.01
Fibrotic area index(%)	Age	-0.31	-0.63, 0.01	0.06
Fibrotic area index(%)	Sex	7.88	0.48, 15.28	0.04
Fat area index(%)	Age	0.47	-0.24, 1.19	0.19
Fat area index(%)	Sex	-9.96	-27.10, 7.19	0.26
