# Supplementary material
Source: Research Square preprint supplement (doi:10.21203/rs.3.rs-8899039/v1)
Supplement: Supplementary file 3 [file 7b006da18efb2920409ba6df.xlsx]

## Sheet: Supplementary table 2 
Supplementary table 2. Univariate linear mixed-effects model analysis of the association between inflammatory cell infiltration and fibrous area index.
Dependent Variable	Independent Variable	Estimate	95% CI	P
Fibrotic area index(%)	Inflammation Score	1.24	-2.46, 4.95	0.51
